# Supplementary material for: Nutrient Level Determines Biofilm Characteristics and Subsequent Impact on Microbial Corrosion and Biocide Effectiveness
Source: PubMed Central journal article supplement (PMC7082584; doi:10.1128/aem.02885-19), 2020-03-18
Supplement: AEM.02885-19-s0001.pdf [file AEM.02885-19-s0001.pdf]

## *Supplementary material*

### **Nutrient level determines biofilm characteristics and the subsequent impact on microbial corrosion and biocide effectiveness**

**Silvia J. Salgar-Chaparro<sup>a</sup>, Katerina Lepkova<sup>a</sup>, Thunyaluk Pojtanabuntoeng<sup>a</sup>, Adam Darwin<sup>b</sup>, Laura L. Machuca<sup>a#</sup>**

<sup>a</sup> Curtin Corrosion Centre, WA School of Mines: Minerals, Energy and Chemical Engineering, Curtin University, Bentley, WA, Australia

<sup>b</sup> Woodside Energy Ltd., Perth, WA, Australia

#### **\* Correspondence:**

Laura L. Machuca

[l.machuca2@curtin.edu.au](mailto:l.machuca2@curtin.edu.au)

### **Content**

**Table S1.** Chemical quantitative analysis of produced water in sampled floating production storage and offloading (FPSO) facilities

**Table S2.** Culture media composition for microbial growth

**Table S3.** Minimum inhibitory concentration test results

**Table S4.** Most probable number (MPN) of planktonic cells exposed to different nutrient conditions

**Table S5.** Statistical test of the effect of nutrients on microbial activity (adenine nucleotides concentration) and pit depth.

**Table S6.** Adenosine nucleotides concentration and adenylate energy charge of planktonic communities grown under different nutrient conditions.

**Table S7.** Mean microbial community composition of biofilms grown under different nutrient conditions (%) (n = 2).

**Table S8.** Alpha diversity indices of biofilms grown under different nutrient conditions

**Table S9.** Corrosion rate calculated from the mass loss of three carbon steel coupons exposed to each condition.

**Figure S1.** 3D optical microscope surface image of carbon steel coupon exposed to abiotic conditions.

**Figure S2.** SEM images from cross-sectioned coupons exposed to different nutrients conditions. [1] resin; [2] Metal; [3] corroded area; [4] top surface layer. C1: Consortium 1, C2: Consortium 2.

**Figure S3.** Phosphorous and calcium maps of cross-sectioned coupons exposed to Consortium 2 under batch (A) and continuous replenishment of nutrients (B).

**Table S1.** Chemical quantitative analysis of produced water in sampled floating production storage and offloading (FPSO) facilities

| Compound / Element   | Limit of detection<br>(mg/L) | Sample |        |
|----------------------|------------------------------|--------|--------|
|                      |                              | FPSO 1 | FPSO 2 |
| Calcium              | 0.1                          | 835    | 330    |
| Iron                 | 0.01                         | 2.35   | <0.01  |
| Potassium            | 0.1                          | 340    | 15     |
| Magnesium            | 0.1                          | 400    | 210    |
| Manganese            | 0.01                         | 0.43   | 0.08   |
| Sodium               | 0.1                          | 11500  | 8100   |
| Nickel               | 0.01                         | 0.02   | <0.01  |
| Sulphur              | 0.05                         | 1      | 530    |
| Zinc                 | 0.01                         | <0.01  | 0.02   |
| Arsenic              | 0.001                        | 0.005  | 0.003  |
| NOx-N                | 0.01                         | <0.01  | <0.01  |
| Nitrate-N            | 0.01                         | <0.01  | <0.01  |
| Nitrite-N            | 0.01                         | <0.01  | <0.01  |
| Ammonia-N            | 0.02                         | 25.5   | 34     |
| Chloride             | 5                            | 19500  | 18000  |
| Sulphate             | 1                            | <1     | 1800   |
| Thiosulphate         | 2                            | 6.8    | 6.9    |
| Total Organic Carbon | 1                            | 2.5    | 66     |
| Total Nitrogen       | 0.2                          | 31.5   | 96     |
| Total Phosphorus     | 0.01                         | 0.16   | 7.3    |
| Alkalinity           | 5                            | 300    | 770    |
| Salinity             | 10                           | 36000  | 28000  |

**Table S2.** Culture media composition for microbial growth

| <b>Ingredients</b>                                                 | <b>g/L</b> |
|--------------------------------------------------------------------|------------|
| <b><i>Sulphide producing prokaryotes and methanogens (SPP)</i></b> |            |
| Ammonium chloride                                                  | 0.25       |
| Ascorbic Acid                                                      | 0.1        |
| Bacto-casitone                                                     | 1          |
| D-Glucose                                                          | 1.1        |
| Dibasic Potassium Phosphate                                        | 0.14       |
| Iron(II) Sulphate Heptahydrate                                     | 0.5        |
| Magnesium Sulphate Heptahydrate                                    | 4.5        |
| Potassium Chloride                                                 | 0.34       |
| Sodium Acetate                                                     | 2          |
| Sodium Bicarbonate                                                 | 5          |
| Sodium Chloride                                                    | 5          |
| Sodium Formate                                                     | 13         |
| Sodium Lactate 50%                                                 | 10 mL      |
| Sodium Thiosulfate Pentahydrate                                    | 1.88       |
| Yeast Extract                                                      | 2          |
| Di-Water                                                           | 990 mL     |
| <b><i>Acid producing bacteria</i></b>                              |            |
| Beef extract                                                       | 1          |
| Bacto-casitone                                                     | 10         |
| D-Glucose                                                          | 5          |
| Sodium chloride                                                    | 20         |
| Phenol red                                                         | 0.018      |
| Di-Water                                                           | 1000 mL    |
| <b><i>Iron Oxidizing bacteria</i></b>                              |            |
| Calcium Chloride Dihydrate                                         | 0.13       |
| Ammonium Iron Citrate                                              | 6          |
| Ammonium Nitrate                                                   | 0.5        |
| Dipotassium Hydrogen Orthophosphate                                | 0.5        |
| Magnesium Sulphate Heptahydrate                                    | 0.5        |
| Sodium Chloride                                                    | 20         |
| Sodium Nitrate                                                     | 0.5        |
| Di-Water                                                           | 1000 mL    |
| <b><i>Iron Reducing Bacteria</i></b>                               |            |
| Ammonium Chloride                                                  | 1.5        |
| Calcium Chloride Dihydrate                                         | 0.1        |
| Dipotassium Hydrogen Orthophosphate                                | 0.46       |
| Ferric Citrate                                                     | 0.703      |
| Magnesium Chloride Hexahydrate                                     | 0.1        |
| Magnesium Sulphate Heptahydrate                                    | 0.1        |
| Manganese Chloride Tetrahydrate                                    | 0.005      |
| Potassium Chloride                                                 | 0.1        |
| Sodium Acetate                                                     | 0.7        |
| Sodium Bicarbonate                                                 | 2.5        |
| Sodium Chloride                                                    | 5          |
| Sodium Molybdate Dihydrate                                         | 0.001      |
| Yeast Extract                                                      | 0.05       |
| Di-Water                                                           | 1000 mL    |

**Table S3.** Minimum inhibitory concentration test results

| <b>Glutaraldehyde<br/>Concentration<br/>(ppm)</b> | <b>Microbial<br/>concentration<br/>(cell/mL)</b> |
|---------------------------------------------------|--------------------------------------------------|
| 0                                                 | $(6.1 \pm 0.6) \times 10^7$                      |
| 50                                                | $(1.3 \pm 0.2) \times 10^7$                      |
| 100                                               | $(5.3 \pm 2.3) \times 10^6$                      |
| 200                                               | $(5.1 \pm 2.5) \times 10^6$                      |
| 400                                               | $(2.7 \pm 0.3) \times 10^6$                      |
| 1000                                              | $(1.5 \pm 0.2) \times 10^6$                      |
| 2000                                              | $(4.2 \pm 0.1) \times 10^5$                      |
| 2500                                              | BDL*                                             |

Errors represent standard deviation from 3 independent replicates

\*BDL, below detection limit of the Neubauer counting chamber ( $1 \times 10^4$ ).

**Table S4.** Most probable number (MPN) of planktonic cells exposed to different nutrient conditions

| Consortia    | Condition  | MPN SPP  | 95% Confidence Limit |          |
|--------------|------------|----------|----------------------|----------|
|              |            | Cell/mL  | Lower                | Higher   |
| Consortium 1 | Batch      | 1.10E+08 | 3.60E+07             | 4.18E+08 |
|              | Continuous | 2.40E+04 | 4.20E+03             | 2.40E+06 |
| Consortium 2 | Batch      | 1.10E+09 | 1.80E+08             | 4.51E+11 |
|              | Continuous | 3.50E+07 | 8.70E+06             | 3.29E+08 |

MPN determined from 3-tube serial dilutions  
Abbreviations: SPP = sulphide producing prokaryotes

**Table S5.** Statistical test of the effect of nutrients on microbial activity (adenine nucleotides concentration) and pit depth.

| Consortia    | Condition      | ATP      |                 | ADP      |                 | AMP      |                 | Pit depth |                 |
|--------------|----------------|----------|-----------------|----------|-----------------|----------|-----------------|-----------|-----------------|
|              |                | $\chi^2$ | <i>p</i> -value | $\chi^2$ | <i>p</i> -value | $\chi^2$ | <i>p</i> -value | $\chi^2$  | <i>p</i> -value |
| Consortium 1 | Before biocide | 9.4      | 0.012*          | 8.7      | 0.012*          | 7.6      | 0.031*          | 1.2       | 0.33            |
| Consortium 1 | After biocide  | 9.4      | 0.113           | 8.7      | 0.113           | 7.6      | 0.089           | ND        | ND              |
| Consortium 2 | Before biocide | 9.5      | 0.017*          | 9.4      | 0.009**         | 10.4     | 0.041*          | 29.3      | < 0.001***      |
| Consortium 2 | After biocide  | 9.5      | 0.089           | 9.4      | 0.141           | 10.4     | 0.041*          | ND        | ND              |

$\chi^2$ : Kruskal-Wallis chi-squared values, *p*-value: pairwise Dunn Test

Significance:  $p \leq 0.001 = ***$ ,  $p \leq 0.01 = **$ ,  $p \leq 0.05 = *$ ,  $p > 0.05 =$  not significant

Abbreviation: ND = not determined

**Table S6.** Adenosine nucleotides concentration and adenylate energy charge of planktonic communities grown under different nutrient conditions.

| <b>Consortia</b>         | <b>Consortium 1</b> |                   | <b>Consortium 2</b> |                   |
|--------------------------|---------------------|-------------------|---------------------|-------------------|
| <b>Condition</b>         | <b>Batch</b>        | <b>Continuous</b> | <b>Batch</b>        | <b>Continuous</b> |
| ATP (pg/mL)              | 12,106 ± 1,616      | 742,608 ± 15,894  | 8,372 ± 1,397       | 568,777 ± 53,533  |
| ADP (pg/mL)              | 2,830 ± 643         | 14,962 ± 1,789    | 1,096 ± 284         | 58,477 ± 24,961   |
| AMP (pg/mL)              | 26,983 ± 4,938      | 443,681 ± 19,126  | 8,533 ± 970         | 396,054 ± 28,587  |
| Total Adenylates (ng/mL) | 42 ± 7.1            | 1,201 ± 52        | 18 ± 2.6            | 1,023 ± 82        |
| AEC                      | 0.32 ± 0.01         | 0.63 ± 0.01       | 0.49 ± 0.02         | 0.58 ± 0.01       |
| % ATP                    | 29 ± 1.5            | 63 ± 2.1          | 46 ± 1.5            | 56 ± 1.9          |
| % ADP                    | 7 ± 0.4             | 1 ± 0.7           | 6 ± 0.8             | 6 ± 2.3           |
| % AMP                    | 64 ± 1.1            | 38 ± 0.9          | 48 ± 2.1            | 39 ± 0.6          |

Errors represent standard deviation from 3 independent replicates

**Table S7.** Mean microbial community composition of biofilms grown under different nutrient conditions (%) (n = 2).

| Microorganism                                   | Total (DNA)  |       |              |       | Active (RNA) |       |              |       |
|-------------------------------------------------|--------------|-------|--------------|-------|--------------|-------|--------------|-------|
|                                                 | Consortium 1 |       | Consortium 2 |       | Consortium 1 |       | Consortium 2 |       |
|                                                 | B            | C     | B            | C     | B            | C     | B            | C     |
| <i>Methanobacterium</i> (Archaea)               | 6.20         | 0.10  |              |       | 12.77        | 0.01  |              |       |
| <i>Methanothermobacter</i> (Archaea)            | 0.02         | 0.05  |              |       |              |       |              |       |
| <i>Methanoculleus</i> (Archaea)                 | 0.19         | 0.20  |              |       | 6.23         | 0.48  |              |       |
| <i>Micrococcus</i> (Bacteria)                   |              |       |              |       | 0.02         |       |              |       |
| <i>Proteiniphilum</i> (Bacteria)                | 0.07         | 0.32  | 0.02         | 0.10  | 0.16         | 0.14  | 0.23         | 0.55  |
| <i>Anaerophaga</i> (Bacteria)                   | 0.54         | 3.34  | 0.13         | 4.47  | 0.53         | 9.92  | 0.53         | 2.59  |
| Uncultured <i>Prolixibacteraceae</i> (Bacteria) | 0.30         | 0.02  |              |       | 1.71         | 0.02  |              |       |
| <i>Bergeyella</i> (Bacteria)                    |              |       |              |       | <0.01        |       |              |       |
| <i>Bacillus</i> (Bacteria)                      | 0.08         | 0.01  | 13.66        | 18.83 | 0.06         |       | 0.13         | 0.10  |
| <i>Lactobacillus</i> (Bacteria)                 |              |       |              |       |              |       | 0.13         |       |
| <i>Thermoanaerobacter</i> (Bacteria)            |              |       |              | 0.14  |              |       |              |       |
| Uncultured <i>Limnochordales</i> (Bacteria)     | 0.02         | 0.01  |              |       |              |       |              |       |
| <i>Halocella</i> (Bacteria)                     |              |       |              | <0.01 |              |       |              |       |
| <i>Paracoccus</i> (Bacteria)                    |              |       |              |       | <0.01        |       | <0.01        |       |
| <i>Sphingomonas</i> (Bacteria)                  |              | 0.01  |              | 0.15  |              |       |              |       |
| <i>Desulfocarbo</i> (Bacteria)                  | 0.21         | 0.23  |              |       | 7.61         | 0.52  |              |       |
| <i>Desulfovibrio</i> (Bacteria)                 | 79.96        | 63.22 | 74.89        | 67.22 | 20.07        | 36.36 | 73.96        | 62.05 |
| <i>Pelobacter</i> (Bacteria)                    | 0.01         | 0.11  |              | 0.01  | 0.09         | 1.00  |              | 0.54  |
| <i>Geoalkalibacter</i> (Bacteria)               | 0.01         |       |              |       | 0.13         |       |              |       |
| <i>Marinobacter</i> (Bacteria)                  | 0.25         | 0.00  |              |       | 0.38         | 0.01  | 0.04         |       |
| <i>Shewanella</i> (Bacteria)                    |              |       |              |       |              |       | <0.01        |       |
| <i>Pseudomonas</i> (Bacteria)                   | 3.70         | 3.59  | 0.21         | 0.48  | 3.09         | 0.22  | 0.90         | 0.77  |
| <i>Thioalbus</i> (Bacteria)                     | 1.10         | 0.04  |              |       | 36.16        | 0.23  | 0.01         | 0.01  |
| <i>Acetomicrobium</i> (Bacteria)                | 4.86         | 17.22 | 7.95         | 1.08  | 7.51         | 28.53 | 16.16        | 4.80  |
| Uncultured <i>Synergistaceae</i> (Bacteria)     |              |       |              |       | 0.03         |       |              |       |
| <i>Thermovirga</i> (Bacteria)                   | 1.82         | 8.73  | 2.52         | 4.09  | 1.06         | 4.46  | 5.34         | 4.78  |
| <i>Mesotoga</i> (Bacteria)                      | 0.28         | 0.03  |              |       | 1.46         | 0.04  | 0.01         |       |
| <i>Kosmotoga</i> (Bacteria)                     | 0.05         | 0.17  |              |       | 0.16         | 0.07  |              |       |
| <i>Petrotoga</i> (Bacteria)                     | 0.33         | 2.60  | 0.61         | 3.42  | 0.76         | 18.00 | 2.56         | 23.81 |

Abbreviation: B = Batch; C = Continuous



**Table S8.** Alpha diversity indices of biofilms grown under different nutrient conditions

| <b>Consortia</b> | <b>Condition</b> | <b>Simpson index</b> | <b>Shannon index</b> |
|------------------|------------------|----------------------|----------------------|
| Consortium 1     | Batch            | $0.4 \pm 0.06$       | $1.3 \pm 0.16$       |
|                  | Continuous       | $0.6 \pm 0.04$       | $1.9 \pm 0.22$       |
| Consortium 2     | Batch            | $0.5 \pm 0.10$       | $1.8 \pm 0.33$       |
|                  | Continuous       | $0.6 \pm 0.03$       | $2.1 \pm 0.10$       |

Errors represent standard deviation from 2 independent replicates

**Table S9.** Corrosion rate calculated from the mass loss of three carbon steel coupons exposed to each condition.

| <b>Consortia</b> | <b>Corrosion rate (<math>mm\ y^{-1}</math>)</b> |                   |
|------------------|-------------------------------------------------|-------------------|
|                  | <b>Batch</b>                                    | <b>Continuous</b> |
| Consortium 1     | $0.04 \pm 0.02$                                 | $0.03 \pm 0.01$   |
| Consortium 2     | $0.13 \pm 0.01$                                 | $0.41 \pm 0.10$   |

Errors represent standard deviation from 3 independent replicates

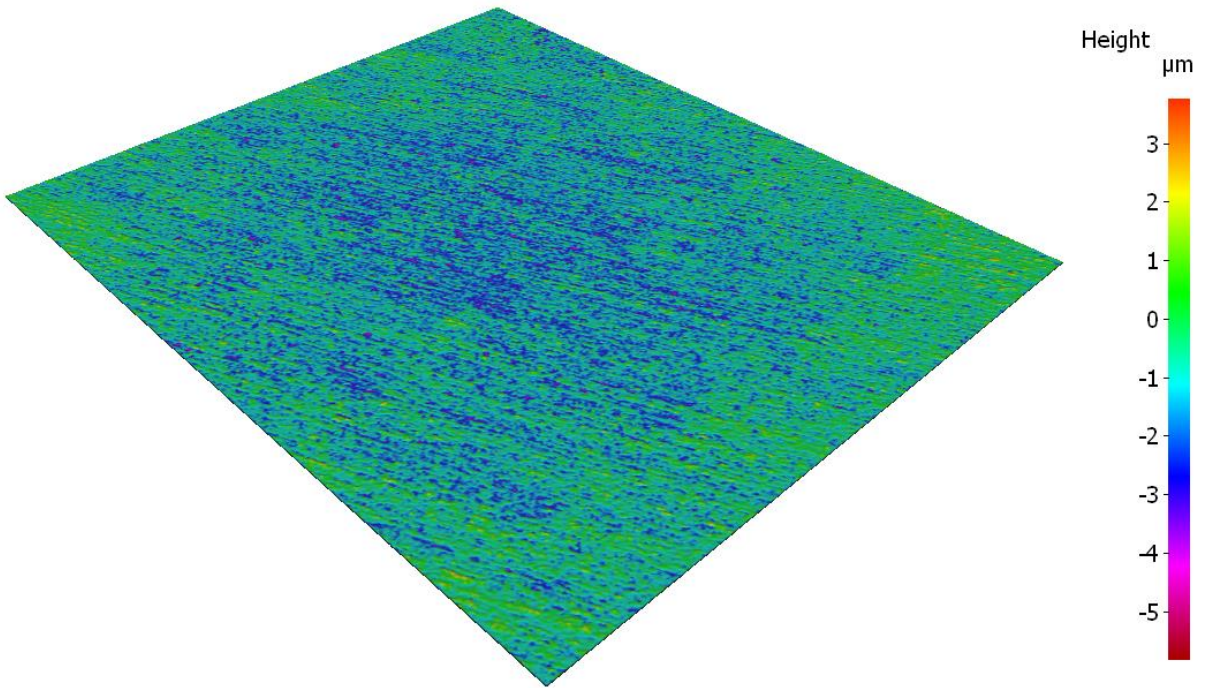

**Figure S1.** 3D optical microscope surface image of carbon steel coupon exposed to abiotic conditions.

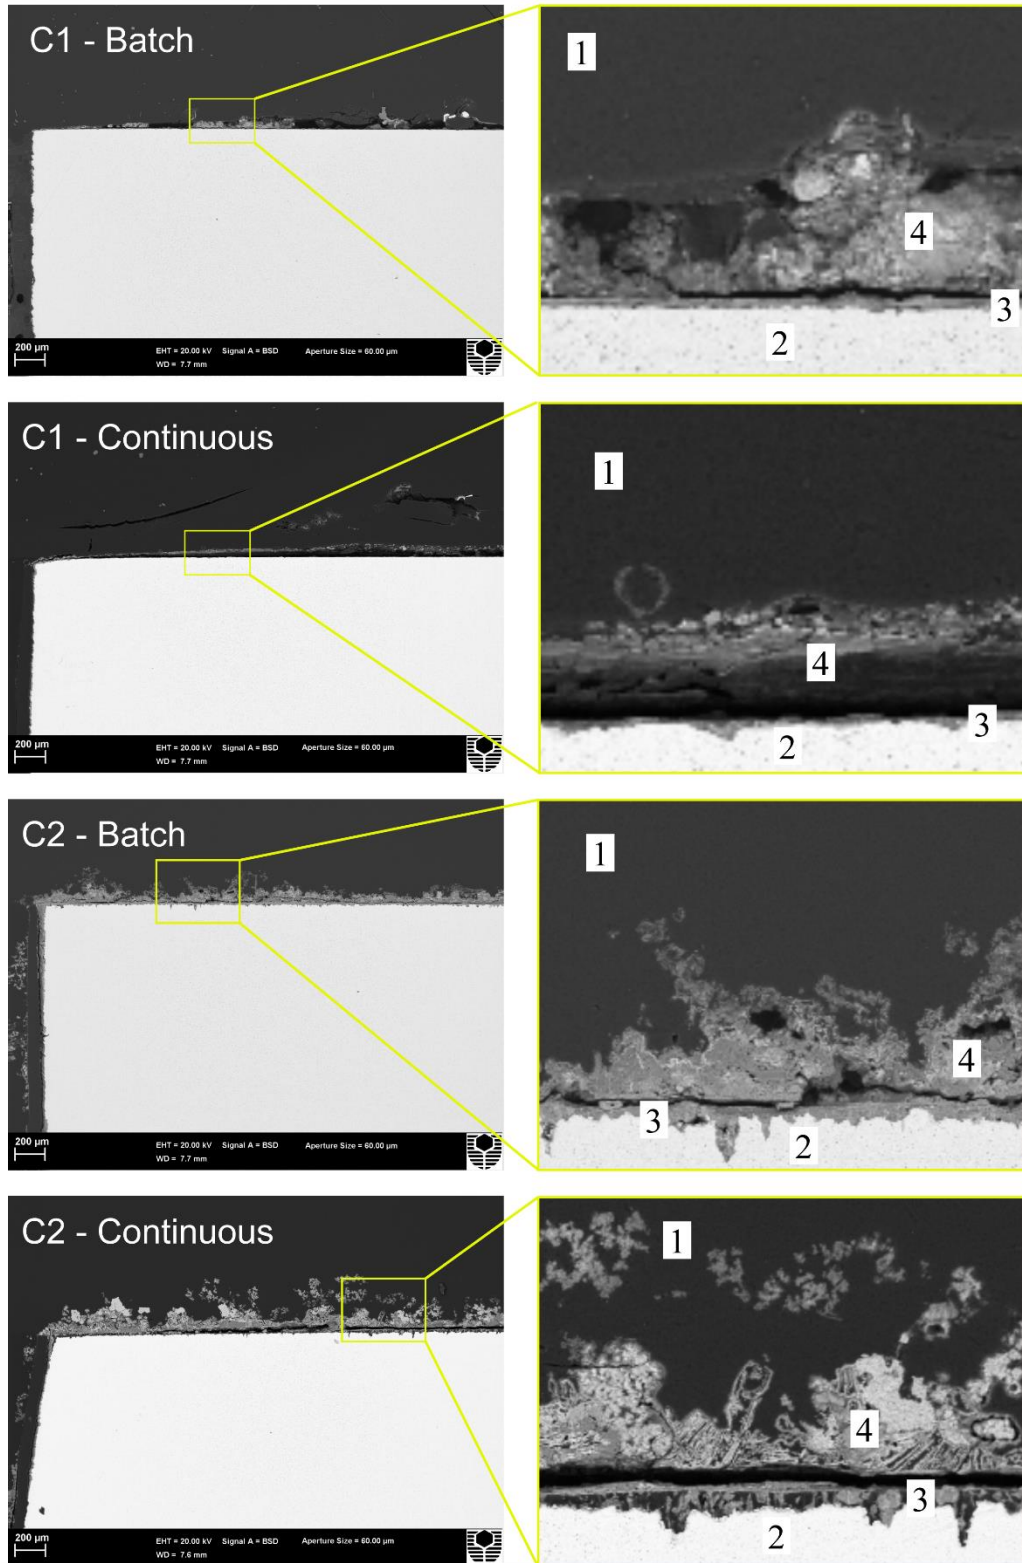

**Figure S2.** SEM images from cross-sectioned coupons exposed to different nutrients conditions. [1] resin; [2] Metal; [3] corroded area; [4] top surface layer. C1: Consortium 1, C2: Consortium 2.

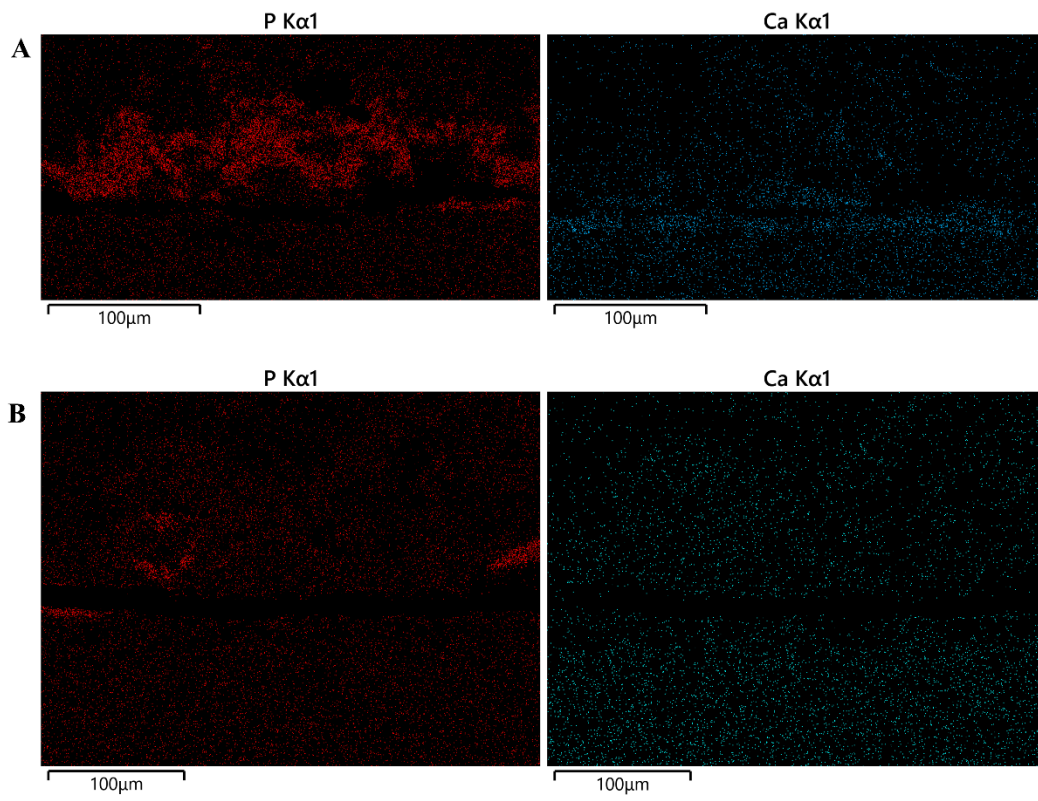

**Figure S3.** Phosphorous and calcium maps of cross-sectioned coupons exposed to Consortium 2 under batch (A) and continuous replenishment of nutrients (B).
